# Supplementary material
Source: PubMed Central journal article supplement (PMC7328527)

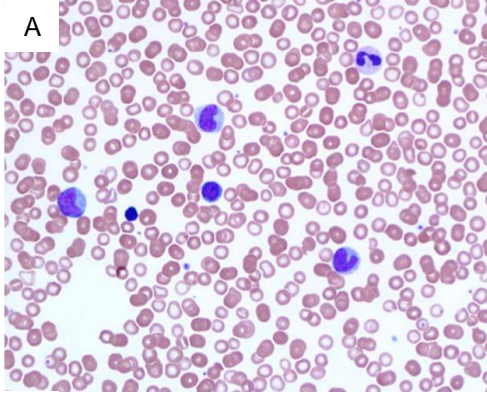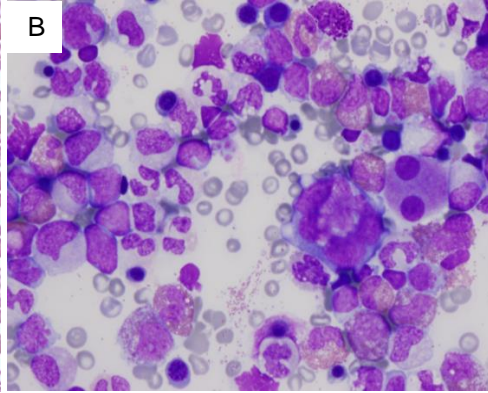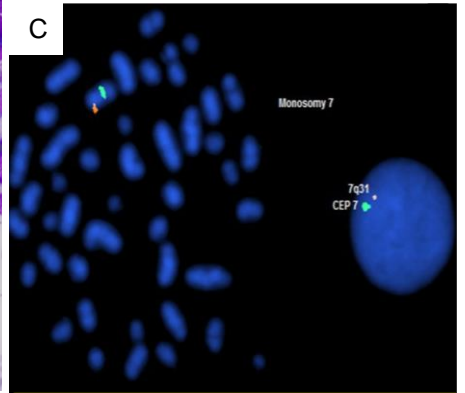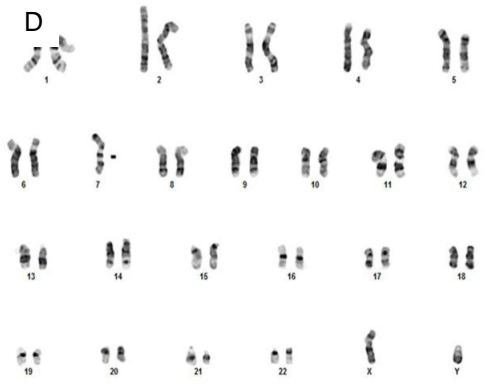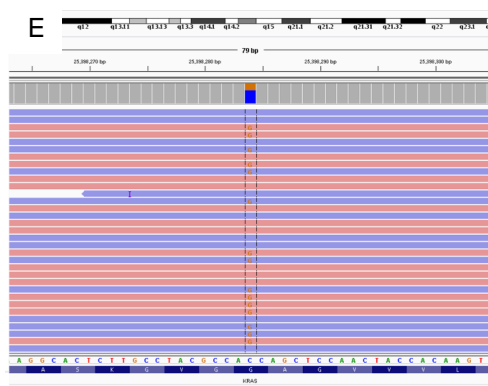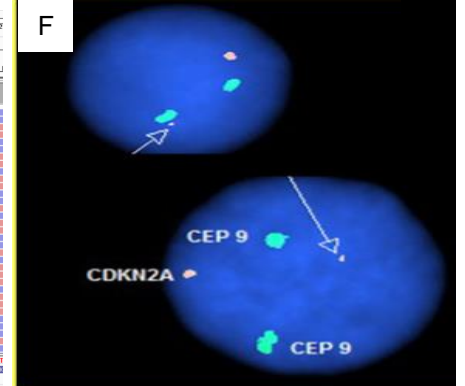

Supplement: NIHMS1598201-supplement-Supplemental_Figure_1.pdf [file NIHMS1598201-supplement-Supplemental_Figure_1.pdf]

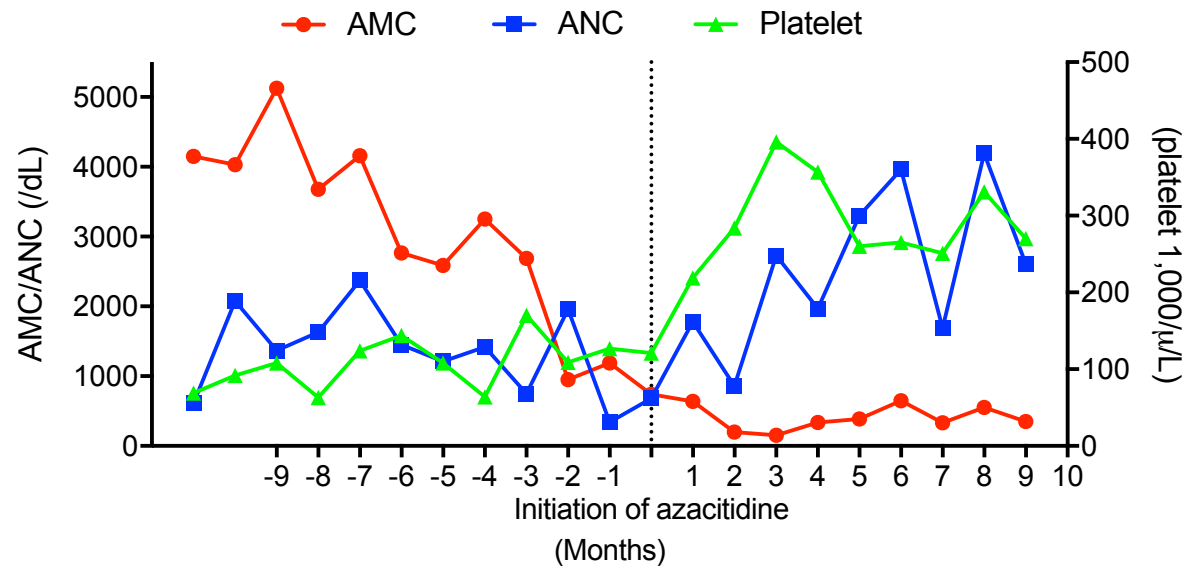

Supplement: NIHMS1598201-supplement-Supplemental_Figure_2.pdf [file NIHMS1598201-supplement-Supplemental_Figure_2.pdf]
